# Supplementary material
Source: PubMed Central journal article supplement (PMC4255395)
Supplement: CJN.02130214_CJN02130214SupplementaryData.pdf [file CJN.02130214_CJN02130214SupplementaryData.pdf]

## **Online Supplemental**

eFigure 1: Number of surveys published in 4 nephrology journals per 1000 citations from 2001-2011

eFigure 2: Number of surveys published per 1000 citations per year (2001 to 2011)

eTable 1: List of references and key characteristics guidelines

eAppendix 1: Data Abstraction Form

**eFigure 1:** Number of surveys published in 4 nephrology journals per 1000 citations from 2001-2011

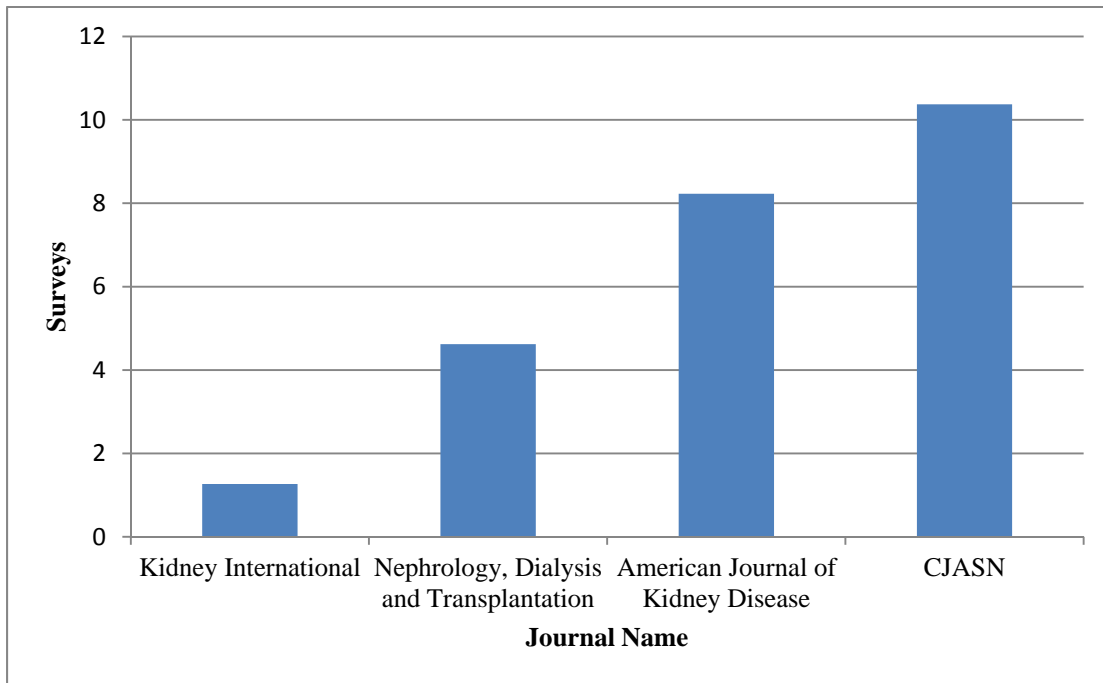

$P < 0.001$ , Chi-square test.

**eFigure 2:** Number of surveys published per 1000 citations per year (2001 to 2011)

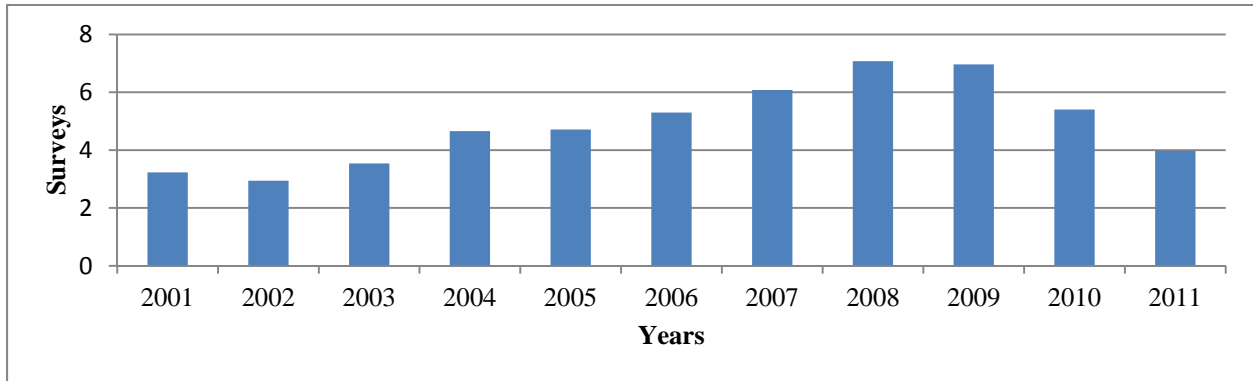

$P = 0.051$ , Cochran-Armitage test

**Note:** The Clinical Journal of the American Society of Nephrology began publishing journals in the year 2006.

**eTable 1:** List of references and key characteristics

|    | Author           | Year Published | Country(ies)/continent survey was conducted | Were reminders to repeat delivery of surveys used after the initial survey delivery? | Did the authors offer reimbursement for completion? | Did the authors state an eligibility list? | Was a previously published instrument used? | Pretesting | did the study report climimetric properties | Did the authors report that the study received REB approval? | Was the amount of missing data reported? | Were characteristics of respondents reported? | Was the survey instrument included, appended, or linked to the report? | Did they use a flowchart of survey responses? |
|----|------------------|----------------|---------------------------------------------|--------------------------------------------------------------------------------------|-----------------------------------------------------|--------------------------------------------|---------------------------------------------|------------|---------------------------------------------|--------------------------------------------------------------|------------------------------------------|-----------------------------------------------|------------------------------------------------------------------------|-----------------------------------------------|
| 1  | Gabolde et al.   | 2001           | Europe                                      | No                                                                                   | No                                                  | No                                         | No                                          | No         | No                                          | No                                                           | No                                       | Minimally                                     | No                                                                     | No                                            |
| 2  | Miura et al.     | 2001           | Asia                                        | Not Reported                                                                         | No                                                  | No                                         | No                                          | No         | No                                          | No                                                           | Completely                               | Extensively                                   | Yes                                                                    | No                                            |
| 3  | Moss et al.      | 2001           | US                                          | Not applicable                                                                       | No                                                  | Yes                                        | No                                          | Yes        | No                                          | Yes                                                          | No                                       | Extensively                                   | Yes                                                                    | No                                            |
| 4  | Sekkarie et al.  | 2001           | US and Canada                               | Yes                                                                                  | No                                                  | No                                         | No                                          | No         | No                                          | No                                                           | No                                       | Minimally                                     | Partially                                                              | No                                            |
| 5  | Mendelson et al. | 2001           | US                                          | Yes                                                                                  | No                                                  | No                                         | No                                          | Yes        | No                                          | No                                                           | No                                       | Extensively                                   | Partially                                                              | No                                            |
| 6  | Wilson et al.    | 2001           | Multinational                               | Yes                                                                                  | No                                                  | No                                         | No                                          | Yes        | Yes                                         | No                                                           | No                                       | Extensively                                   | Yes                                                                    | No                                            |
| 7  | Griva et al.     | 2002           | Europe                                      | No                                                                                   | No                                                  | Yes                                        | Yes                                         | No         | Yes                                         | Yes                                                          | Partially                                | Extensively                                   | Partially                                                              | No                                            |
| 8  | Jassal et al.    | 2002           | Europe                                      | Yes                                                                                  | No                                                  | Yes                                        | Yes                                         | Yes        | No                                          | Yes                                                          | No                                       | Minimally                                     | Partially                                                              | No                                            |
| 9  | Persson et al.   | 2002           | Europe                                      | No                                                                                   | No                                                  | No                                         | No                                          | Yes        | No                                          | Yes*                                                         | Completely                               | No                                            | Partially                                                              | No                                            |
| 10 | Mehrotra et al.  | 2002           | US and Canada                               | Yes                                                                                  | No                                                  | No                                         | No                                          | No         | No                                          | Yes                                                          | Partially                                | Extensively                                   | Yes                                                                    | No                                            |
| 11 | Belasco et al.   | 2002           | Other                                       | No                                                                                   | No                                                  | Yes                                        | Yes                                         | No         | No                                          | Yes                                                          | No                                       | Extensively                                   | Yes                                                                    | No                                            |
| 12 | Zimmerman et al. | 2003           | Canada                                      | Yes                                                                                  | No                                                  | No                                         | No                                          | Yes        | No                                          | Yes                                                          | No                                       | Extensively                                   | No                                                                     | No                                            |
| 13 | Harwell et al.   | 2003           | US                                          | Yes                                                                                  | No                                                  | Yes                                        | No                                          | No         | No                                          | No                                                           | Completely                               | Minimally                                     | No                                                                     | No                                            |

|    |                   |      |               |              |     |     |     |     |     |      |            |             |           |     |
|----|-------------------|------|---------------|--------------|-----|-----|-----|-----|-----|------|------------|-------------|-----------|-----|
| 14 | Holly et al.      | 2003 | US            | Yes          | Yes | Yes | Yes | Yes | No  | Yes  | No         | Extensively | Partially | No  |
| 15 | Johansen et al.   | 2003 | US            | Not Reported | No  | Yes | No  | No  | No  | Yes  | Partially  | Extensively | No        | No  |
| 16 | Pradel et al.     | 2003 | US            | No           | No  | Yes | No  | Yes | No  | Yes  | Partially  | Extensively | No        | No  |
| 17 | McLaughlin et al. | 2003 | Canada        | Yes          | Yes | No  | No  | Yes | Yes | Yes  | Partially  | Extensively | No        | No  |
| 18 | Conesa et al.     | 2004 | Europe        | No           | No  | Yes | No  | Yes | No  | No   | Partially  | Extensively | Yes       | No  |
| 19 | lennerling et al. | 2004 | Europe        | Yes          | No  | Yes | No  | Yes | No  | Yes  | No         | Minimally   | Partially | No  |
| 20 | Ayanian et al.    | 2004 | US            | Yes          | Yes | No  | No  | Yes | No  | Yes  | Completely | Extensively | Partially | No  |
| 21 | Berman et al.     | 2004 | US            | No           | No  | No  | Yes | No  | Yes | Yes  | No         | Extensively | Partially | No  |
| 22 | Israni et al.     | 2004 | US            | Yes          | No  | Yes | No  | No  | No  | Yes  | No         | Extensively | Yes       | Yes |
| 23 | Bajwa et al.      | 2004 | US            | No           | No  | No  | Yes | No  | Yes | No   | Completely | Extensively | Yes       | No  |
| 24 | Giraldi et al.    | 2004 | Europe        | No           | No  | No  | No  | No  | No  | No   | No         | Extensively | Partially | No  |
| 25 | Conesa et al.     | 2004 | Europe        | No           | No  | Yes | Yes | No  | Yes | No   | Completely | Extensively | Yes       | No  |
| 26 | Goldfarb et al.   | 2005 | US            | Yes          | No  | No  | No  | No  | No  | Yes  | No         | Extensively | No        | No  |
| 27 | Stothers et al.   | 2005 | Canada        | Yes          | No  | Yes | No  | Yes | Yes | Yes  | Partially  | Extensively | Partially | No  |
| 28 | Gunda et al.      | 2005 | Europe        | Yes          | No  | Yes | No  | No  | No  | No   | Completely | Minimally   | Yes       | No  |
| 29 | Cohen et al.      | 2005 | US            | Yes          | No  | No  | Yes | No  | No  | Yes  | Completely | No          | Partially | No  |
| 30 | Geddes et al.     | 2005 | Europe        | No           | No  | Yes | No  | No  | No  | Yes* | Completely | Minimally   | Yes       | No  |
| 31 | Taylor et al.     | 2005 | US            | No           | No  | Yes | No  | No  | No  | No   | Partially  | Extensively | Yes       | No  |
| 32 | Vigneau et al.    | 2005 | Europe        | Yes          | No  | Yes | No  | No  | No  | No   | Completely | No          | No        | No  |
| 33 | Morelon et al.    | 2005 | Europe        | No           | No  | No  | No  | Yes | No  | No   | No         | Minimally   | No        | No  |
| 34 | Cunningham et al. | 2006 | Australasia   | Yes          | No  | Yes | No  | No  | No  | No   | Completely | Extensively | Yes       | No  |
| 35 | Ricci et al.      | 2006 | Multinational | No           | No  | No  | No  | No  | No  | No   | Partially  | Minimally   | No        | No  |
| 36 | Zimmerman et al.  | 2006 | Canada        | No           | No  | Yes | No  | Yes | No  | Yes  | Completely | Extensively | partially | No  |
| 37 | Belasco et al.    | 2006 | Other         | No           | No  | Yes | Yes | No  | Yes | Yes  | No         | Extensively | Partially | No  |
| 38 | Lea et al.        | 2006 | US            | No           | Yes | Yes | No  | No  | No  | No   | No         | Extensively | No        | No  |
| 39 | Miura et al.      | 2006 | Asia          | No           | No  | No  | No  | No  | No  | Yes  | No         | Extensively | Yes       | No  |
| 40 | Shalkham et al.   | 2006 | US            | No           | No  | No  | No  | No  | No  | No   | No         | No          | No        | No  |
| 41 | Boulware et al.   | 2006 | US            | Yes          | Yes | Yes | No  | Yes | No  | Yes  | Partially  | Extensively | No        | No  |

|    |                    |      |               |              |     |     |     |     |     |     |            |             |           |     |
|----|--------------------|------|---------------|--------------|-----|-----|-----|-----|-----|-----|------------|-------------|-----------|-----|
| 42 | Mendelssohn et al. | 2006 | Canada        | Yes          | No  | Yes | No  | Yes | No  | Yes | No         | Extensively | Partially | No  |
| 43 | Davison et al.     | 2006 | US and Canada | Yes          | No  | No  | Yes | No  | No  | Yes | No         | Extensively | Partially | No  |
| 44 | Juurgensen et al.  | 2006 | US            | No           | No  | Yes | No  | Yes | No  | no  | No         | Extensively | Yes       | No  |
| 45 | Housawi et al.     | 2007 | Multinational | No           | No  | Yes | No  | Yes | No  | No  | Completely | Minimally   | partially | No  |
| 46 | Hutichinson et al. | 2007 | Europe        | Yes          | No         | Minimally   | No        | No  |
| 47 | Klersy et al.      | 2007 | Europe        | No           | No  | Yes | Yes | No  | Yes | Yes | No         | Extensively | No        | No  |
| 48 | Visser et al.      | 2007 | Europe        | Yes          | Yes | No  | No  | Yes | No  | Yes | Partially  | Extensively | Partially | No  |
| 49 | Weisbord et al.    | 2007 | US            | No           | No  | Yes | Yes | No  | Yes | No  | Partially  | Extensively | No        | No  |
| 50 | Hyre et al.        | 2007 | US            | Not Reported | No  | Yes | Yes | No  | Yes | Yes | Partially  | Extensively | Yes       | No  |
| 51 | Lai et al.         | 2007 | Asia          | Not Reported | No  | Yes | Yes | No  | Yes | Yes | Completely | Extensively | Partially | Yes |
| 52 | Tagay et al.       | 2007 | Europe        | No           | No  | Yes | Yes | No  | Yes | No  | Completely | Extensively | Partially | No  |
| 53 | Cukor et al.       | 2007 | US            | No           | Yes | No  | Yes | No  | yes | Yes | No         | Extensively | No        | No  |
| 54 | Overberger et al.  | 2007 | US            | No           | No  | No  | No  | No  | No  | Yes | No         | No          | Yes       | No  |
| 55 | Weisbord et al.    | 2007 | US            | No           | No  | Yes | Yes | No  | No  | Yes | No         | Minimally   | Partially | No  |
| 56 | Banas et al.       | 2008 | Europe        | No           | No  | No  | No  | No  | No  | Yes | Completely | Extensively | Partially | No  |
| 57 | Fan et al.         | 2008 | Europe        | No           | No  | No  | Yes | No  | No  | Yes | No         | Extensively | No        | Yes |
| 58 | Kranenburg et al.  | 2008 | Europe        | No           | Yes | No  | Yes | Yes | No  | No  | No         | Extensively | Yes       | No  |
| 59 | Parekh et al.      | 2008 | US            | No           | No  | No  | No  | Yes | No  | Yes | Completely | Extensively | No        | No  |
| 60 | Rios et al.        | 2008 | Europe        | No           | No  | No  | No  | Yes | Yes | No  | Completely | Extensively | No        | No  |
| 61 | Accetta et al.     | 2008 | US            | Yes          | No  | Yes | Yes | Yes | No  | No  | Partially  | Minimally   | Yes       | No  |
| 62 | Agarwal et al.     | 2008 | US            | No           | Yes | Yes | No  | Yes | Yes | Yes | Completely | Extensively | Yes       | No  |
| 63 | Argentero et al.   | 2008 | Europe        | No           | No  | Yes | Yes | Yes | Yes | No  | Partially  | Extensively | No        | No  |
| 64 | Waterman et al.    | 2008 | US            | Yes          | No  | Yes | No  | Yes | Yes | Yes | Completely | Extensively | Yes       | No  |
| 65 | Young et al.       | 2008 | Canada        | No           | No  | Yes | Yes | Yes | Yes | Yes | No         | Extensively | Yes       | Yes |
| 66 | Berns et al.       | 2008 | US            | Yes          | No  | No  | No  | No  | No  | No  | Partially  | No          | Yes       | No  |

|    |                  |      |               |     |     |     |           |     |     |      |            |             |           |     |
|----|------------------|------|---------------|-----|-----|-----|-----------|-----|-----|------|------------|-------------|-----------|-----|
| 67 | Pradel et al.    | 2008 | US            | Yes | No  | Yes | No        | Yes | No  | Yes* | Partially  | Extensively | Partially | No  |
| 68 | Reese et al.     | 2008 | US            | No  | No  | Yes | No        | Yes | Yes | Yes  | Partially  | Extensively | Partially | No  |
| 69 | Abdel et al.     | 2009 | US            | No  | No  | Yes | Yes       | No  | No  | Yes  | Partially  | Extensively | Partially | No  |
| 70 | Aasebo et al.    | 2009 | Europe        | No  | No  | No  | Yes       | No  | Yes | Yes  | Partially  | Extensively | Yes       | No  |
| 71 | Bouvier et al.   | 2009 | Europe        | Yes | No  | Yes | Yes       | No  | No  | No   | Partially  | No          | Yes       | No  |
| 72 | Couchoud et al.  | 2009 | Multinational | Yes | No  | No  | No        | No  | No  | No   | Partially  | Minimally   | Yes       | No  |
| 73 | Vamos et al.     | 2009 | Europe        | No  | No  | Yes | No        | Yes | No  | Yes  | Partially  | Extensively | Partially | No  |
| 74 | Wong et al.      | 2009 | Australasia   | Yes | No  | Yes | No        | Yes | No  | Yes  | Completely | Extensively | No        | No  |
| 75 | Bond et al.      | 2009 | US            | Yes | No  | Yes | Yes       | No  | No  | No   | Partially  | No          | Partially | Yes |
| 76 | Hurley et al.    | 2009 | US            | Yes | No  | Yes | No        | Yes | No  | Yes  | Completely | Extensively | Yes       | No  |
| 77 | Irving et al.    | 2009 | Australasia   | Yes | No  | Yes | Yes       | Yes | No  | Yes  | Partially  | Extensively | Yes       | Yes |
| 78 | Israni et al.    | 2009 | US            | Yes | Yes | Yes | No        | Yes | Yes | Yes  | Partially  | Extensively | Yes       | No  |
| 79 | Charles et al.   | 2009 | US            | Yes | Yes | Yes | No        | No  | No  | Yes  | Completely | Extensively | Yes       | No  |
| 80 | Cukor et al.     | 2009 | US            | No  | No  | No  | Yes       | No  | Yes | No   | Completely | Extensively | Partially | No  |
| 81 | Agarwel et al.   | 2009 | US            | No  | Yes | Yes | No        | Yes | Yes | Yes  | Completely | Extensively | Yes       | No  |
| 82 | Cafazzo et al.   | 2009 | Canada        | Yes | No  | Yes | Yes       | No  | Yes | Yes  | No         | Extensively | Partially | Yes |
| 83 | Bollee et al.    | 2010 | Europe        | No  | No  | No  | No        | No  | No  | No   | Partially  | Extensively | Yes       | No  |
| 84 | Davison et al.   | 2010 | Canada        | Yes | No  | Yes | No        | No  | No  | No   | No         | Extensively | Partially | No  |
| 85 | Kurella et al.   | 2010 | US            | No  | No  | Yes | Yes       | No  | No  | Yes  | Partially  | Extensively | Partially | No  |
| 86 | Xi et al.        | 2010 | US and Canada | Yes | No  | Yes | No        | Yes | No  | Yes  | Partially  | Extensively | Yes       | No  |
| 87 | Abdel et al.     | 2010 | US            | Yes | No  | Yes | No        | Yes | No  | Yes  | Partially  | Extensively | Yes       | No  |
| 88 | Davison et al.   | 2010 | Canada        | No  | No  | Yes | No        | Yes | Yes | Yes  | No         | Extensively | Partially | No  |
| 89 | Diamant et al.   | 2010 | Canada        | No  | No  | Yes | Yes       | No  | Yes | Yes  | Partially  | Extensively | Partially | No  |
| 90 | Evans et al.     | 2010 | US            | No  | No  | Yes | No        | Yes | No  | No   | No         | Minimally   | No        | No  |
| 91 | Hizo-abes et al. | 2010 | Canada        | Yes | No  | Yes | Partially | Yes | Yes | Yes  | Partially  | Extensively | Partially | Yes |
| 92 | Weinstein et al. | 2010 | US and Canada | No  | No  | No  | No        | Yes | No  | No   | Completely | Extensively | Yes       | No  |
| 93 | Wong et al.      | 2010 | US            | Yes | No  | Yes | No        | Yes | No  | Yes  | Completely | Extensively | Yes       | No  |
| 94 | Allen et al.     | 2011 | Multinational | Yes | No  | Yes | No        | Yes | No  | Yes  | Partially  | Extensively | No        | Yes |

|                      |                 |      |               |     |     |     |     |     |     |      |            |             |           |    |
|----------------------|-----------------|------|---------------|-----|-----|-----|-----|-----|-----|------|------------|-------------|-----------|----|
| 95                   | Hobson et al.   | 2011 | Europe        | Yes | No  | Yes | No  | Yes | No  | Yes* | Completely | Extensively | Yes       | No |
| 96                   | Sanner et al.   | 2011 | Europe        | Yes | No  | Yes | No  | Yes | No  | No   | Partially  | Extensively | No        | No |
| 97                   | Song et al.     | 2011 | US            | No  | Yes | Yes | Yes | No  | Yes | Yes  | Partially  | Extensively | Partially | No |
| 98                   | Toussant et al. | 2011 | Australasia   | No  | No  | Yes | No  | No  | No  | Yes  | Completely | Extensively | No        | No |
| 99                   | Fadem et al.    | 2011 | US            | No   | Partially  | Extensively | No        | No |
| 100                  | Foster et al.   | 2011 | US            | No  | No  | Yes | Yes | Yes | No  | Yes  | Completely | Extensively | Partially | No |
| 101                  | Garonzik et al. | 2011 | US            | No  | No  | Yes | No  | No  | No  | No   | Partially  | No          | No        | No |
| 102                  | Palacio et al.  | 2011 | Multinational | No  | No  | Yes | No  | No  | No  | No   | No         | No          | Yes       | No |
| *Stated not required |                 |      |               |     |     |     |     |     |     |      |            |             |           |    |



## References

1. Gabolde M, Herve C, Moulin AM: Evaluation, selection, and follow-up of live kidney donors: a review of current practice in French renal transplant centres. *Nephrol Dial Transplant*, 16: 2048-2052, 2001
2. Miura Y, Asai A, Nagata S, Ohnishi M, Shimbo T, Hosoya T, Fukuhara S: Dialysis patients' preferences regarding cardiopulmonary resuscitation and withdrawal of dialysis in Japan. *Am J Kidney Dis*, 37: 1216-1222, 2001
3. Moss AH, Hozayen O, King K, Holley JL, Schmidt RJ: Attitudes of patients toward cardiopulmonary resuscitation in the dialysis unit. *Am J Kidney Dis*, 38: 847-852, 2001
4. Sekkarie M, Cosma M, Mendelssohn D: Nonreferral and nonacceptance to dialysis by primary care physicians and nephrologists in Canada and the United States. *Am J Kidney Dis*, 38: 36-41, 2001
5. Mendelssohn DC, Mullaney SR, Jung B, Blake PG, Mehta RL: What do American nephrologists think about dialysis modality selection? *Am J Kidney Dis*, 37: 22-29, 2001
6. Wilson R, Godwin M, Seguin R, Burrows P, Caulfield P, Toffelmire E, Morton R, White P, Rogerson M, Eisele G, Bont G: End-stage renal disease: factors affecting referral decisions by family physicians in Canada, the United States, and Britain. *Am J Kidney Dis*, 38: 42-48, 2001
7. Griva K, Ziegelmann JP, Thompson D, Jayasena D, Davenport A, Harrison M, Newman SP: Quality of life and emotional responses in cadaver and living related renal transplant recipients. *Nephrol Dial Transplant*, 17: 2204-2211, 2002
8. Jassal SV, Krishna G, Mallick NP, Mendelssohn DC: Attitudes of British Isles nephrologists towards dialysis modality selection: a questionnaire study. *Nephrol Dial Transplant*, 17: 474-477, 2002
9. Persson MO, Persson NH, Kallen R, Ekberg H, Hermeren G: Kidneys from marginal donors: views of patients on informed consent. *Nephrol Dial Transplant*, 17: 1497-1502, 2002
10. Mehrotra R, Blake P, Berman N, Nolph KD: An analysis of dialysis training in the United States and Canada. *Am J Kidney Dis*, 40: 152-160, 2002
11. Belasco AG, Sesso R: Burden and quality of life of caregivers for hemodialysis patients. *Am J Kidney Dis*, 39: 805-812, 2002
12. Zimmermann DL, Selick A, Singh R, Mendelssohn DC: Attitudes of Canadian nephrologists, family physicians and patients with kidney failure toward primary care delivery for chronic dialysis patients. *Nephrol Dial Transplant*, 18: 305-309, 2003
13. Harwell TS, Nelson RG, Little RR, McDowall JM, Helgeson SD, Gohdes D: Testing for microalbuminuria in 2002: barriers to implementing current guidelines. *Am J Kidney Dis*, 42: 245-248, 2003
14. Holley JL, Carmody SS, Moss AH, Sullivan AM, Cohen LM, Block SD, Arnold RM: The need for end-of-life care training in nephrology: national survey results of nephrology fellows. *Am J Kidney Dis*, 42: 813-820, 2003
15. Johansen KL, Sakkas GK, Doyle J, Shubert T, Dudley RA: Exercise counseling practices among nephrologists caring for patients on dialysis. *Am J Kidney Dis*, 41: 171-178, 2003
16. Pradel FG, Limcangco MR, Mullins CD, Bartlett ST: Patients' attitudes about living donor transplantation and living donor nephrectomy. *Am J Kidney Dis*, 41: 849-858, 2003
17. McLaughlin K, Manns B, Mortis G, Hons R, Taub K: Why patients with ESRD do not select self-care dialysis as a treatment option. *Am J Kidney Dis*, 41: 380-385, 2003
18. Conesa C, Rios Zambudio A, Ramirez P, Canteras M, del Mar Rodriguez M, Parrilla P: Socio-personal profile of teenagers opposed to organ donation. *Nephrol Dial Transplant*, 19: 1269-1275, 2004
19. Lennerling A, Forsberg A, Meyer K, Nyberg G: Motives for becoming a living kidney donor. *Nephrol Dial Transplant*, 19: 1600-1605, 2004
20. Ayanian JZ, Cleary PD, Keogh JH, Noonan SJ, David-Kasdan JA, Epstein AM: Physicians' beliefs about racial differences in referral for renal transplantation. *Am J Kidney Dis*, 43: 350-357, 2004
21. Berman E, Merz JF, Rudnick M, Snyder RW, Rogers KK, Lee J, et al. Religiosity in a hemodialysis population and its relationship to satisfaction with medical care, satisfaction with life, and adherence. *American Journal of Kidney Diseases*. 2004 Sep;44(3):488-97.
22. Israni AK, Halpern SD, McFadden C, Israni RK, Wasserstein A, Kobrin S, Berns JS: Willingness of dialysis patients to participate in a randomized controlled trial of daily dialysis. *Kidney international*, 65: 990-998, 2004
23. Bajwa ZH, Sial KA, Malik AB, Steinman TI: Pain patterns in patients with polycystic kidney disease. *Kidney international*, 66: 1561-1569, 2004
24. Girardi V, Schaedeli F, Marti HP, Frey FJ, Uehlinger DE: The willingness of patients to accept an additional mortality risk in order to improve renal graft survival. *Kidney international*, 66: 375-382, 2004
25. Conesa C, Rios Zambudio A, Ramirez P, Canteras M, del Mar Rodriguez M, Parrilla P: Socio-personal profile of teenagers opposed to organ donation. *Nephrol Dial Transplant*, 19: 1269-1275, 2004
26. Goldfarb DS, Fischer ME, Keich Y, Goldberg J: A twin study of genetic and dietary influences on nephrolithiasis: a report from the Vietnam Era Twin (VET) Registry. *Kidney international*, 67: 1053-1061, 2005
27. Stothers L, Gourlay WA, Liu L: Attitudes and predictive factors for live kidney donation: a comparison of live kidney donors versus nondonors. *Kidney international*, 67: 1105-1111, 2005
28. Gunda S, Thomas M, Smith S: National survey of palliative care in end-stage renal disease in the UK. *Nephrol Dial Transplant*, 20: 392-395, 2005
29. Cohen LM, Germain MJ, Woods AL, Mirot A, Burleson JA: The family perspective of ESRD deaths. *Am J Kidney Dis*, 45: 154-161, 2005
30. Geddes CC, Rodger RSC, Smith C, Ganai A: Allocation of Deceased Donor Kidneys for Transplantation: Opinions of Patients with CKD. *Am J Kidney Dis*, 46: 949-956, 2005

31. Taylor M, Johnson AM, Tison M, Fain P, Schrier RW: Earlier diagnosis of autosomal dominant polycystic kidney disease: importance of family history and implications for cardiovascular and renal complications. *Am J Kidney Dis*, 46: 415-423, 2005
32. Vigneau C, Guiard-Schmid JB, Tourret J, Flahault A, Rozenbaum W, Pialoux G, Rondeau E: The clinical characteristics of HIV-infected patients receiving dialysis in France between 1997 and 2002. *Kidney international*, 67: 1509-1514, 2005
33. Morelon E, Berthoux F, Brun-Strang C, Fior S, Volle R: Partners' concerns, needs and expectations in ESRD: results of the CODIT Study. *Nephrol Dial Transplant*, 20: 1670-1675, 2005
34. Cunningham J, Cass A, Anderson K, Snelling P, Devitt J, Preece C, Eris J: Australian nephrologists' attitudes towards living kidney donation. *Nephrol Dial Transplant*, 21: 1178-1183, 2006
35. Ricci Z, Ronco C, D'Amico G, De Felice R, Rossi S, Bolgan I, Bonello M, Zamperetti N, Petras D, Salvatori G, Dan M, Piccinni P: Practice patterns in the management of acute renal failure in the critically ill patient: an international survey. *Nephrol Dial Transplant*, 21: 690-696, 2006
36. Zimmerman D, Albert S, Llewellyn-Thomas H, Hawker GA: The influence of socio-demographic factors, treatment perceptions and attitudes to living donation on willingness to consider living kidney donor among kidney transplant candidates. *Nephrol Dial Transplant*, 21: 2569-2576, 2006
37. Belasco A, Barbosa D, Bettencourt AR, Diccini S, Sesso R: Quality of life of family caregivers of elderly patients on hemodialysis and peritoneal dialysis. *Am J Kidney Dis*, 48: 955-963, 2006
38. Lea JP, McClellan WM, Melcher C, Gladstone E, Hostetter T: CKD risk factors reported by primary care physicians: do guidelines make a difference? *Am J Kidney Dis*, 47: 72-77, 2006
39. Miura Y, Asai A, Matsushima M, Nagata S, Onishi M, Shimbo T, Hosoya T, Fukuhara S: Families' and physicians' predictions of dialysis patients' preferences regarding life-sustaining treatments in Japan. *Am J Kidney Dis*, 47: 122-130, 2006
40. Shalkham AS, Kirrane BM, Hoffman RS, Goldfarb DS, Nelson LS: The availability and use of charcoal hemoperfusion in the treatment of poisoned patients. *Am J Kidney Dis*, 48: 239-241, 2006
41. Boulware LE, Troll MU, Jaar BG, Myers DI, Powe NR: Identification and referral of patients with progressive CKD: a national study. *Am J Kidney Dis*, 48: 192-204, 2006
42. Mendelssohn DC, Toffelmire EB, Levin A: Attitudes of Canadian nephrologists toward multidisciplinary team-based CKD clinic care. *Am J Kidney Dis*, 47: 277-284, 2006
43. Davison SN, Jhangri GS, Holley JL, Moss AH: Nephrologists' reported preparedness for end-of-life decision-making. *Clin J Am Soc Nephrol*, 1: 1256-1262, 2006
44. Juergensen E, Wueth D, Finkelstein SH, Juergensen PH, Bekui A, Finkelstein FO: Hemodialysis and peritoneal dialysis: patients' assessment of their satisfaction with therapy and the impact of the therapy on their lives. *Clin J Am Soc Nephrol*, 1: 1191-1196, 2006
45. Housawi AA, Young A, Boudville N, Thiessen-Philbrook H, Muirhead N, Rehman F, Parikh CR, Al-Obaidli A, El-Triki A, Garg AX, Donor Nephrectomy Outcomes Research N: Transplant professionals vary in the long-term medical risks they communicate to potential living kidney donors: an international survey. *Nephrol Dial Transplant*, 22: 3040-3045, 2007
46. Hutchison CA, Dasgupta I: National survey of heparin-induced thrombocytopenia in the haemodialysis population of the UK population. *Nephrol Dial Transplant*, 22: 1680-1684, 2007
47. Klersy C, Callegari A, Martinelli V, Vizzardi V, Navino C, Malberti F, Turchini R, Montagna G, Guastoni C, Bellazzi R, Rampino T, David S, Barbieri C, Dal Canton A, Politi P, Working Group on B, Dialysis: Burnout in health care providers of dialysis service in Northern Italy--a multicentre study. *Nephrol Dial Transplant*, 22: 2283-2290, 2007
48. Visser A, Dijkstra GJ, Huisman RM, Gansevoort RT, de Jong PE, Reijneveld SA: Differences between physicians in the likelihood of referral and acceptance of elderly patients for dialysis--influence of age and comorbidity. *Nephrol Dial Transplant*, 22: 3255-3261, 2007
49. Weisbord SD, Fried LF, Unruh ML, Kimmel PL, Switzer GE, Fine MJ, Arnold RM: Associations of race with depression and symptoms in patients on maintenance haemodialysis. *Nephrol Dial Transplant*, 22: 203-208, 2007
50. Hyre AD, Cohen AJ, Kutner N, Alper AB, Muntner P: Prevalence and predictors of posttraumatic stress disorder among hemodialysis patients following Hurricane Katrina. *Am J Kidney Dis*, 50: 585-593, 2007
51. Lai C-F, Kao T-W, Wu M-S, Chiang S-S, Chang C-H, Lu C-S, Yang C-S, Yang C-C, Chang H-W, Lin S-L, Chang C-J, Chen P-Y, Wu K-D, Tsai T-J, Chen W-Y: Impact of near-death experiences on dialysis patients: a multicenter collaborative study. *Am J Kidney Dis*, 50: 124-132, 132.e121-122, 2007
52. Tagay S, Kribben A, Hohenstein A, Mewes R, Senf W: Posttraumatic stress disorder in hemodialysis patients. *Am. J. Kidney Dis*. 50: 594-601, 2007
53. Cukor D, Coplan J, Brown C, Friedman S, Cromwell-Smith A, Peterson RA, Kimmel PL: Depression and anxiety in urban hemodialysis patients. *Clin J Am Soc Nephrol*, 2: 484-490, 2007
54. Overberger P, Pesacreta M, Palevsky PM, Network VNARFT: Management of renal replacement therapy in acute kidney injury: a survey of practitioner prescribing practices. *Clin J Am Soc Nephrol*, 2: 623-630, 2007
55. Weisbord SD, Fried LF, Mor MK, Resnick AL, Unruh ML, Palevsky PM, Levenson DJ, Cooksey SH, Fine MJ, Kimmel PL, Arnold RM: Renal provider recognition of symptoms in patients on maintenance hemodialysis. *Clin J Am Soc Nephrol*, 2: 960-967, 2007
56. Banas MC, Banas B, Wolf J, Hoffmann U, Kruger B, Boger CA, Orth SR, Kramer BK: Smoking behaviour of patients before and after renal transplantation. *Nephrol Dial Transplant*, 23: 1442-1446, 2008
57. Fan SL-S, Sathick I, McKitty K, Punzalan S: Quality of life of caregivers and patients on peritoneal dialysis. *Nephrol Dial Transplant*, 23: 1713-1719, 2008
58. Kranenburg L, Schram A, Zuidema W, Weimar W, Hilhorst M, Hessing E, Passchier J, Buschbach J: Public survey of financial incentives for kidney donation. *Nephrol Dial Transplant*, 23: 1039-1042, 2008
59. Parekh AM, Gordon EJ, Garg AX, Waterman AD, Kulkarni S, Parikh CR: Living kidney donor informed consent practices vary between US and non-US centers. *Nephrol Dial Transplant*, 23: 3316-3324, 2008
60. Rios A, Martinez-Alarcon L, Sanchez J, Jarvis N, Garcia JA, Rodriguez JM, Parrilla P, Ramirez P: The quest for favourable subgroups to encourage living kidney donation in Spain. An attitudinal study among British and Irish citizens resident in southeastern Spain. *Nephrol Dial Transplant*, 23: 1720-1727, 2008

61. Accetta NA, Gladstone EH, DiSogra C, Wright EC, Briggs M, Narva AS: Prevalence of estimated GFR reporting among US clinical laboratories. *Am J kidney Dis*, 52:778-87, 2008
62. Agrawal V, Ghosh AK, Barnes MA, McCullough PA: Awareness and knowledge of clinical practice guidelines for CKD among internal medicine residents: a national online survey. *Am J Kidney Dis*, 52: 1061-1069, 2008
63. Argentero P, Dell'Olivo B, Ferretti MS: Staff burnout and patient satisfaction with the quality of dialysis care. *Am J Kidney Dis*, 51: 80-92, 2008
64. Waterman AD, Browne T, Waterman BM, Gladstone EH, Hostetter T: Attitudes and behaviors of African Americans regarding early detection of kidney disease. *Am J Kidney Dis*, 51: 554-562, 2008
65. Young A, Karpinski M, Treleaven D, Waterman A, Parikh CR, Thiessen-Philbrook H, Yang RC, Garg AX: Differences in tolerance for health risk to the living donor among potential donors, recipients, and transplant professionals. *Kidney international*, 73: 1159-1166, 2008
66. Berns JS, O'Neill WC: Performance of procedures by nephrologists and nephrology fellows at U.S. nephrology training programs. *Clin J Am Soc Nephrol*, 3: 941-947, 2008
67. Pradel FG, Jain R, Mullins CD, Vassalotti JA, Bartlett ST: A survey of nephrologists' views on preemptive transplantation. *Clin J Am Soc Nephrol*, 3: 1837-1845, 2008
68. Reese PP, Shea JA, Berns JS, Simon MK, Joffe MM, Bloom RD, Feldman HI: Recruitment of live donors by candidates for kidney transplantation. *Clin J Am Soc Nephrol*, 3: 1152-1159, 2008
69. Abdel-Kader K, Myaskovsky L, Karpov I, Shah J, Hess R, Dew MA, Unruh M: Individual quality of life in chronic kidney disease: influence of age and dialysis modality. *Clin J Am Soc Nephrol*, 4: 711-718, 2009
70. Aasebo W, Homb-Vesteraas NA, Hartmann A, Stavem K: Life situation and quality of life in young adult kidney transplant recipients. *Nephrol Dial Transplant*, 24: 304-308, 2009
71. Bouvier N, Durand P-Y, Testa A, Albert C, Planquois V, Ryckelynck J-P, Lobbedez T: Regional discrepancies in peritoneal dialysis utilization in France: the role of the nephrologist's opinion about peritoneal dialysis. *Nephrol Dial Transplant*, 24: 1293-1297, 2009
72. Couchoud C, Jager KJ, Tomson C, Cabanne J-F, Collart F, Finne P, de Francisco A, Frimat L, Garneata L, Leivestad T, Lemaître V, Limido A, Ots M, Resic H, Stojceva-Taneva O, Kooman J, adequacy Qwgod: Assessment of urea removal in haemodialysis and the impact of the European Best Practice Guidelines. *Nephrol Dial Transplant*, 24: 1267-1274, 2009
73. Vamos EP, Csepanyi G, Zambo M, Molnar MZ, Rethelyi J, Kovacs A, Marton A, Nemeth Z, Novak M, Mucsi I: Sociodemographic factors and patient perceptions are associated with attitudes to kidney transplantation among haemodialysis patients. *Nephrol Dial Transplant*, 24: 653-660, 2009
74. Wong G, Webster AC, Chapman JR, Craig JC: Reported cancer screening practices of nephrologists: results from a national survey. *Nephrol Dial Transplant*, 24: 2136-2143, 2009
75. Bond TC, Patel PR, Krisher J, Sauls L, Deane J, Strott K, Karp S, McClellan W: Association of standing-order policies with vaccination rates in dialysis clinics: a US-based cross-sectional study. *Am J Kidney Dis*, 54: 86-94, 2009
76. Hurley L, Kempe A, Crane LA, Davidson A, Pratte K, Linas S, Dickinson LM, Berl T: Care of undocumented individuals with ESRD: a national survey of US nephrologists. *Am J Kidney Dis*, 53: 940-949, 2009
77. Irving MJ, Johnson DW, McDonald S, Walker RG, Frommer MS, Craig JC: Opinions on the content and effects of clinical practice guidelines for CKD: a survey of nephrologists in Australia and New Zealand. *Am J Kidney Dis*, 53: 1082-1090, 2009
78. Israni RK, Shea JA, Joffe MM, Feldman HI: Physician characteristics and knowledge of CKD management. *Am J Kidney Dis*, 54: 238-247, 2009
79. Charles RF, Powe NR, Jaar BG, Troll MU, Parekh RS, Boulware LE: Clinical testing patterns and cost implications of variation in the evaluation of CKD among US physicians. *Am J Kidney Dis*, 54: 227-237, 2009
80. Cukor D, Rosenthal DS, Jindal RM, Brown CD, Kimmel PL: Depression is an important contributor to low medication adherence in hemodialyzed patients and transplant recipients. *Kidney international*, 75: 1223-1229, 2009
81. Agrawal V, Ghosh AK, Barnes MA, McCullough PA: Perception of indications for nephrology referral among internal medicine residents: a national online survey. *Clin J Am Soc Nephrol*, 4: 323-328, 2009
82. Cafazzo JA, Leonard K, Easty AC, Rossos PG, Chan CT: Patient-perceived barriers to the adoption of nocturnal home hemodialysis. *Clin J Am Soc Nephrol*, 4: 784-789, 2009
83. Bollee G, Martinez F, Moulin B, Meulders Q, Rougier J-P, Baumelou A, Glotz D, Subra J-F, Ulinski T, Vrigneaud L, Brasseur J, Martin L, Daniel L, Kourilsky O, Deteix P, Sie P, Ronco P, Houillier P: Renal biopsy practice in France: results of a nationwide study. *Nephrol Dial Transplant*, 25: 3579-3585, 2010
84. Davison SN, Kromm SK, Currie GR: Patient and health professional preferences for organ allocation and procurement, end-of-life care and organization of care for patients with chronic kidney disease using a discrete choice experiment. *Nephrol Dial Transplant*, 25: 2334-2341, 2010
85. Kurella Tamura M, Goldstein MK, Perez-Stable EJ: Preferences for dialysis withdrawal and engagement in advance care planning within a diverse sample of dialysis patients. *Nephrol Dial Transplant*, 25: 237-242, 2010
86. Xi W, MacNab J, Lok CE, Lee TC, Maya ID, Mokrzycki MH, Moist LM: Who should be referred for a fistula? A survey of nephrologists. *Nephrol Dial Transplant*, 25: 2644-2651, 2010
87. Abdel-Kader K, Patel PR, Kallen AJ, Sinkowitz-Cochran RL, Bolton WK, Unruh ML: Nephrogenic systemic fibrosis: a survey of nephrologists' perceptions and practices. *Clin J Am Soc Nephrol*, 5: 964-971, 2010
88. Davison SN: End-of-life care preferences and needs: perceptions of patients with chronic kidney disease. *Clin J Am Soc Nephrol*, 5: 195-204, 2010
89. Diamant MJ, Harwood L, Movva S, Wilson B, Stitt L, Lindsay RM, Moist LM: A comparison of quality of life and travel-related factors between in-center and satellite-based hemodialysis patients. *Clin J Am Soc Nephrol*, 5: 268-274, 2010
90. Evans RW, Applegate WH, Briscoe DM, Cohen DJ, Rorick CC, Murphy BT, Madsen JC: Cost-related immunosuppressive medication nonadherence among kidney transplant recipients. *Clin J Am Soc Nephrol*, 5: 2323-2328, 2010

91. Hizo-Abes P, Young A, Reese PP, McFarlane P, Wright L, Cuerden M, Garg AX, Donor Nephrectomy Outcomes Research N: Attitudes to sharing personal health information in living kidney donation. *Clin J Am Soc Nephrol*, 5: 717-722, 2010
92. Weinstein AR, Reidy K, Norwood VF, Mahan JD: Factors influencing pediatric nephrology trainee entry into the workforce. *Clin J Am Soc Nephrol*, 5: 1770-1774, 2010
93. Wong LP, Liebman SE, Wakefield KA, Messing S: Training of surgeons in peritoneal dialysis catheter placement in the United States: a national survey. *Clin J Am Soc Nephrol*, 5: 1439-1446, 2010
94. Allen N, Schwartz D, Sood AR, Mendelssohn D, Verrelli M, Tanna G, Schiff J, Komenda P, Rigatto C, Sood MM: Perceived barriers to guidelines in peritoneal dialysis. *Nephrol Dial Transplant*, 26: 1683-1689, 2011
95. Hobson K, Gomm S, Murtagh F, Caress A-L: National survey of the current provision of specialist palliative care services for patients with end-stage renal disease. *Nephrol Dial Transplant*, 26: 1275-1281, 2011
96. Sanner MA, Lagging E, Tibell A: The kidney recipient's path to transplantation: a comparison between living and deceased kidney donor recipients in Stockholm, Sweden. *Nephrol Dial Transplant*, 26: 1053-1057, 2011
97. Song M-K, Gilet CA, Lin F-C, MacHardy N, DeVitoDabbs AJ, Fine JP, Stalberg KD, Fuller E, 3rd: Characterizing daily life experience of patients on maintenance dialysis. *Nephrol Dial Transplant*, 26: 3671-3677, 2011
98. Toussaint ND, Pedagogos E, Beavis J, Becker GJ, Polkinghorne KR, Kerr PG: Improving CKD-MBD management in haemodialysis patients: barrier analysis for implementing better practice. *Nephrol Dial Transplant*, 26: 1319-1326, 2011
99. Fadem SZ, Walker DR, Abbott G, Friedman AL, Goldman R, Sexton S, Buettner K, Robinson K, Peters TG: Satisfaction with renal replacement therapy and education: the American Association of Kidney Patients survey. *Clin J Am Soc Nephrol*, 6: 605-612, 2011
100. Foster M, Brice JH, Shofer F, Principe S, Dewalt D, Falk R, Ferris M: Personal disaster preparedness of dialysis patients in North Carolina. *Clin J Am Soc Nephrol*, 6: 2478-2484, 2011
101. Garonzik Wang JM, Montgomery RA, Kucirka LM, Berger JC, Warren DS, Segev DL: Incompatible live-donor kidney transplantation in the United States: results of a national survey. *Clin J Am Soc Nephrol*, 6: 2041-2046, 2011
102. Palacio S, Gonzales NR, Sangha NS, Birnbaum LA, Hart RG: Thrombolysis for acute stroke in hemodialysis: international survey of expert opinion. *Clin J Am Soc Nephrol*, 6: 1089-1093, 2011

## A) Survey Characteristics

A1. Year of Study: \_\_\_\_\_

A2. Year survey was sent: \_\_\_\_\_

A3. Country of Study: \_\_\_\_\_

A3. Who was the target of the survey?

Patients

Healthcare Workers (i.e. nephrologist, nurse, social worker)

Family Member

A4. Was the survey cross-sectional or longitudinal?

Cross-sectional (*only administered once*)

Longitudinal (*data collected multiple times on same group of people*)

A5. Mode of administration:

Self-Administered (*Paper or Internet*) (*If answered YES proceed to A5.1*)

Phone

Face to Face (*Interview*)

Combination of Methods

Other: \_\_\_\_\_

**A5.1. If self-administered, was it:**

Paper

Internet

Combination of Paper and Internet

**A6. Geographical scope of survey:**

Single Unit (*i.e. a specific dialysis unit within a hospital*)

Single Center (*i.e. one hospital*)

Single City (*i.e. multiple centers in the same city*)

Region within a Country

National

Multinational

Not Reported

Other: \_\_\_\_\_

**A7. Focus of Survey:**

- Knowledge
- Attitudes/Opinions/Perceptions
- Behaviors or Practice
- Not Reported
- Other: \_\_\_\_\_

**A8. Topic of survey:**

- Quality of life
- Dialysis
- Transplantation
- Medication
- Other: \_\_\_\_\_

**A9. Method of FIRST delivery (i.e. pre-notice letter):**

- Postal
- Email
- Electronic (i.e. survey advertised on a website)

- Hand-delivered
- Fax
- Not reported
- Other: \_\_\_\_\_

**A10. Were reminders to repeat delivery of surveys used after the initial survey delivery?**

- Yes
- No
- Not Reported

**A10.1 If yes to above, how many reminders were given? \_\_\_\_\_**

**A11. Did the authors report using Tailor Design Method<sup>†</sup> to maximize recruitment?**

- Yes
- No
- Other Method: \_\_\_\_\_

**A12. Did the authors report a form of reimbursement for completion of the survey or prior to the completion of the survey?**

- Yes



No

**A12.1 If yes to above, what type of reimbursement was given? (i.e. \$5 donation to charity, \$5 gift card):**\_\_\_\_\_

## **B. CHARACTERISTICS OF SURVEY RESPONDENTS**

**B1. Who was the target population? (be specific i.e. transplant surgeons):**\_\_\_\_\_

**B2. Who was actually surveyed?**\_\_\_\_\_

**B3. Professional affiliation (if employee) of population surveyed:**

Nephrologist

Surgeon

General Physician

Pharmacist

Physiotherapist

Nutritionist

Administrator

Other:\_\_\_\_\_

Not reported

Not Applicable

**B4. Type of patient (if patient) surveyed:**

- Dialysis patients
- Transplant recipients
- Living donors
- Families of Patients
- General Public
- Other: \_\_\_\_\_
- Not Reported
- Not Applicable

**C. QUALITY ASSESSMENT**

**C1. Is the question or objective of the study explicitly stated? Must include at least population of interest and focus or scope of the survey:**

- Yes
- No

**C2. Did the authors state an eligibility list? (i.e. inclusion and exclusion list):**

- Yes
- No

Other: \_\_\_\_\_

**C3. How were potential respondents selected (sampling method)?**

Convenience (*i.e. survey administered to conference attendees*)

Random

Stratified

Cluster

Not Reported

Other: \_\_\_\_\_

**C4. Was a previously published instrument used? *Select yes even if it is modified.***

Yes

No

**C5. With regards to survey development, were any of the following mentioned?**

Domains Outlined

Item Generation

Item Reduction

Techniques such as semi-structured or in-depth interviews or focus groups

Assessment of clinical sensibility

- Assessment of clarity
- Pre-testing or pilot testing
- Some testing done, but details are not clear

**C6. Were the following psychometric characteristics of the instrument reported?**

- Face (content) validity
- Construct validity
- criterion validity
- Inter-rater reliability
- Intra-rater Reliability
- Simply states survey instrument has been validated
- Simply states survey instrument is reliable
- Test-retest reliability

**C7. Did the authors report that the study received research ethics board (REB) approval?**

- Yes
- No
- Stated “not required”

Not Reported

**C8. Did the authors report source of funding?**

Yes

No

#### **D. REPORTING AND ANALYSIS**

**D1. Was study design (survey) explicitly explained in title?**

Yes

No

**D2. Number of surveys returned Total for survey, not subgroups if reported:** \_\_\_\_\_

**D3. Was response rate reported correctly?**

Yes

No

Not Reported

**D4. Reported Response Rate Total for survey, not subgroups if reported:** \_\_\_\_\_

**D5. Number of surveys included in the analysis. If included on a question-by-question basis, enter the highest number used:** \_\_\_\_\_

**D6. Did they use a flow diagram of survey responses?**

Yes

No

**D7. What methods of dealing with incomplete surveys were used?**

|                                                   | Yes                      | No                       | Not Reported             |
|---------------------------------------------------|--------------------------|--------------------------|--------------------------|
| All surveys were complete                         | <input type="checkbox"/> | <input type="checkbox"/> | <input type="checkbox"/> |
| Excluded all incomplete surveys from the analysis | <input type="checkbox"/> | <input type="checkbox"/> | <input type="checkbox"/> |
| Included responses on an item-by-item basis       | <input type="checkbox"/> | <input type="checkbox"/> | <input type="checkbox"/> |

**D8. Was the amount of missing data reported?** Completely = report # of respondents who contributed data for each question; Partially = reported for some questions.

Completed

Partially

No

**D9. What type(s) of analysis were used?**

Descriptive (i.e. mean)

Inferential (any statistical test to compare groups that is NOT regression)

Regression

Not reported

Other: \_\_\_\_\_

**D10. If they used regression, did they report 95% CI around the adjusted risk or odds?**

Yes

No

**D11. Did the statistical analysis match their primary objective?**

Yes

No

Not Clear

**D12. Was the survey instrument included, appended, or linked to the report?**

Yes

No

Partially
